# Supplementary material for: Importance of molecular rigidity on reducing the energy losses in organic solar cells: implication from geometric relaxations of A–D–A electron acceptors
Source: Royal Society of Chemistry journal article supplement (doi:10.1039/d1qm00026h), 2021-01-01
Supplement: d1qm00026h1.pdf [file d1qm00026h1.pdf]

## Electronic Supplementary Information

### **Importance of molecular rigidity on reducing the energy losses in organic solar cells: Implication from geometric relaxations of A-D-A electron acceptors**

Ruihong Duan,<sup>ab</sup> Guangchao Han,<sup>a</sup> Ling-Bo Qu,<sup>a</sup> Yuanping Yi,<sup>\*b</sup>

<sup>a</sup>Green Catalysis Center and College of Chemistry, Zhengzhou University, Zhengzhou, Henan 450001, China

<sup>b</sup>Beijing National Laboratory for Molecular Sciences (BNLMS), CAS Research/Education Center for Excellence in Molecular Sciences, CAS Key Laboratory of Organic Solids, Institute of Chemistry, Chinese Academy of Sciences, Beijing 100190, China

\*Corresponding author. E-mail: [ypyi@iccas.ac.cn](mailto:ypyi@iccas.ac.cn).

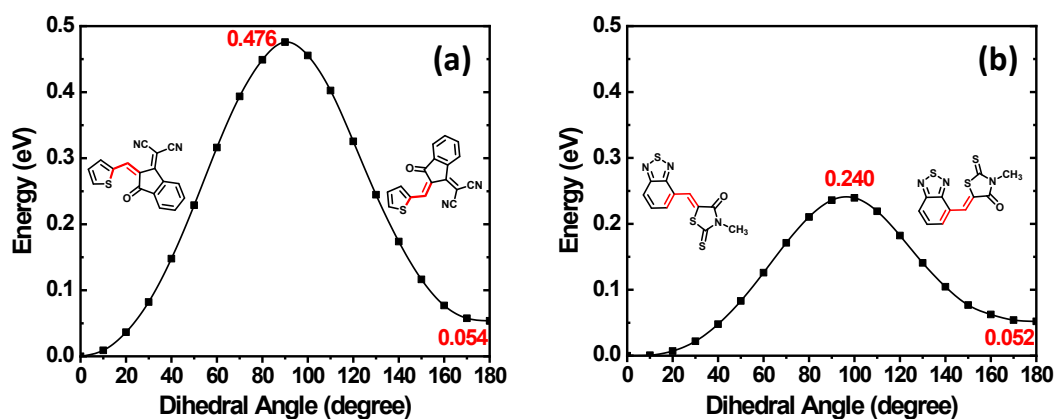

**Figure S1.** Potential energy curves of the relaxed scan for thiophene-IC (a) and benzothiadiazole-Rhodanine (b).

In order to determine the relative orientations of the terminal acceptor units and the central donor units, we performed relaxed scan of thiophene-IC and benzothiadiazole-Rhodanine at the DFT-B3LYP/6-311++G\*\* level. As seen in **Figure S1**, the energy of the O $\cdots$ S conformer is 0.054 eV lower than that of the O $\cdots$ H conformer for thiophene-IC. Although the energy difference is not very large, the transition barrier from the O $\cdots$ S to O $\cdots$ H conformer is as high as 0.476 eV. Similarly, in the case of benzothiadiazole-rhodanine, the energy of the S $\cdots$ H conformer is slightly lower than that of the S $\cdots$ N conformer by 0.052 eV, but the transition barrier is quite high (0.240 eV). Therefore, only the O $\cdots$ S conformer of thiophene-IC and the S $\cdots$ H conformer of benzothiadiazole-Rhodanine are considered in the calculations of the A-D-A molecules.

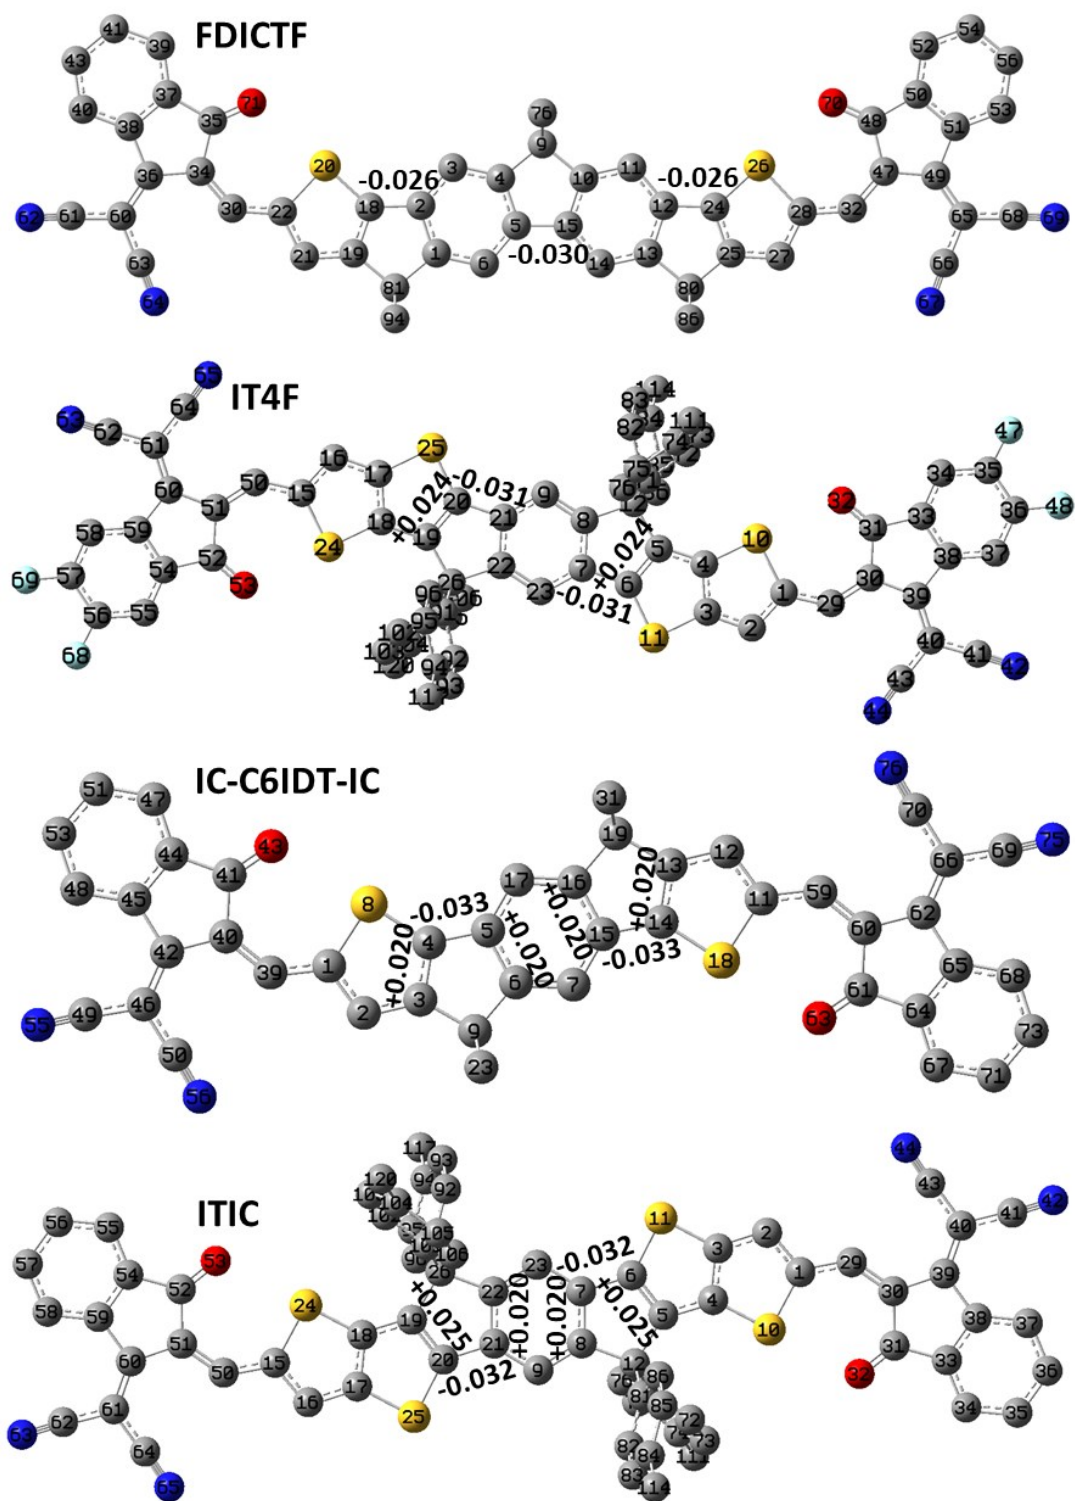

**Figure S2.** Significant bond length changes between the  $S_0$  and  $S_1$  states ( $\Delta B = B(S_1) - B(S_0)$ ) for the fused molecules with  $|\Delta B| \geq 0.02 \text{ \AA}$ .

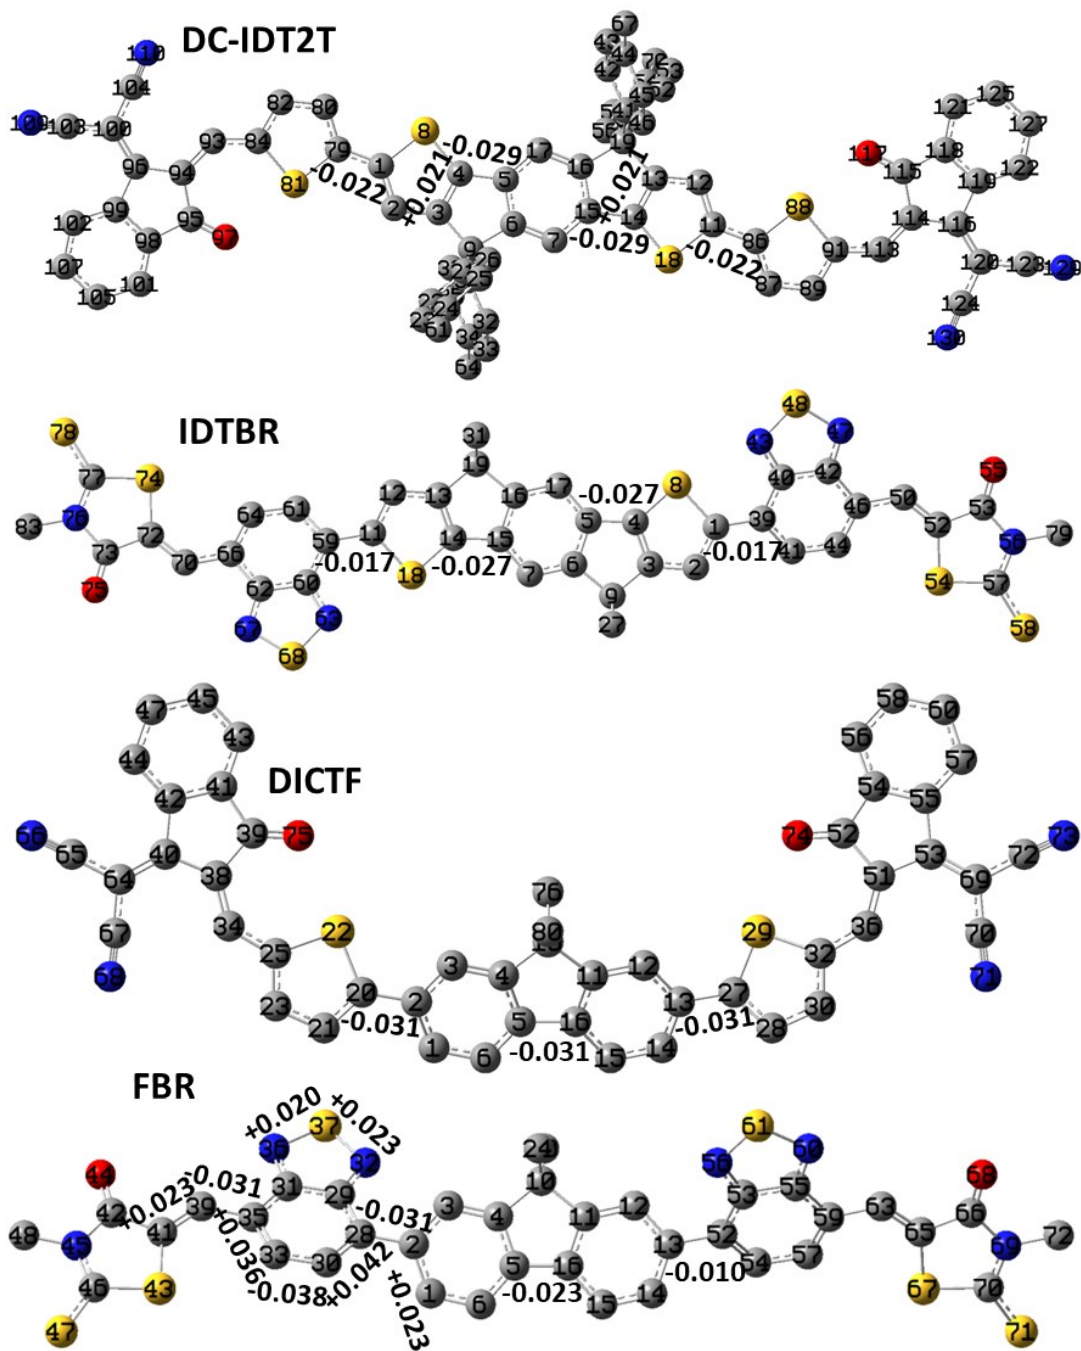

**Figure S3.** Significant bond length changes between the  $S_0$  and  $S_1$  states ( $\Delta B = B(S_1) - B(S_0)$ ) for the non-fused molecules with  $|\Delta B| \geq 0.02 \text{ \AA}$ .

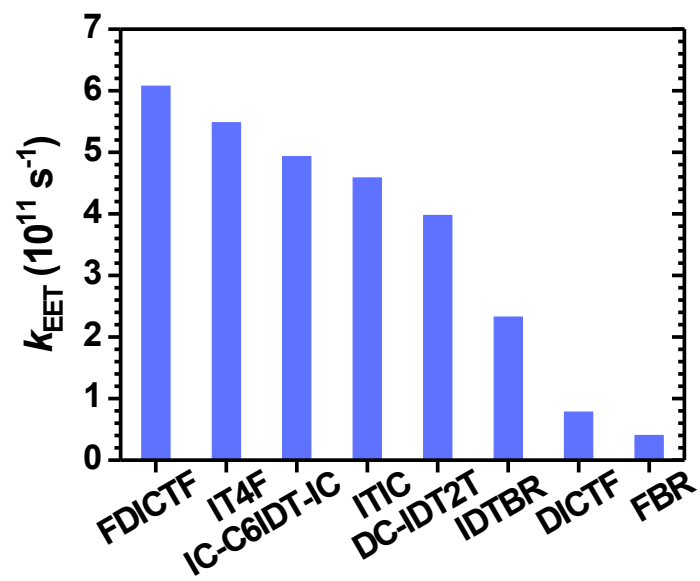

**Figure S4.** Exciton energy transfer rates calculated by the Marcus theory at room temperature ( $T = 300\text{K}$ ) and the excitonic coupling  $V = 0.01 \text{ eV}$ .

**Table S1.** Optimal  $\omega$  values, oscillator strengths  $f$ , vertical excitation and emission energies for the  $S_1$  state, and the contributions of the H $\rightarrow$ L and H-1 $\rightarrow$ L+1 configurations to the  $S_0\rightarrow S_1$  excitation.

|                    | $\omega$<br>(bohr <sup>-1</sup> ) | Excitation |                        | Emission |                        | Configuration     |                       |
|--------------------|-----------------------------------|------------|------------------------|----------|------------------------|-------------------|-----------------------|
|                    |                                   | $f$        | $E_{\text{vert}}$ (eV) | $f$      | $E_{\text{vert}}$ (eV) | H $\rightarrow$ L | H-1 $\rightarrow$ L+1 |
| <b>FDICTF</b>      | 0.105                             | 3.10       | 2.359                  | 3.25     | 2.168                  | 79.1%             | 16.1%                 |
| <b>IT4F</b>        | 0.090                             | 2.94       | 2.171                  | 3.08     | 1.972                  | 85.8%             | 9.9%                  |
| <b>IC-C6IDT-IC</b> | 0.105                             | 2.62       | 2.324                  | 2.73     | 2.116                  | 88.0%             | 8.7%                  |
| <b>ITIC</b>        | 0.095                             | 2.95       | 2.215                  | 3.09     | 2.001                  | 84.8%             | 10.6%                 |
| <b>DC-IDT2T</b>    | 0.095                             | 3.27       | 2.130                  | 3.47     | 1.905                  | 77.8%             | 14.4%                 |
| <b>IDTBR</b>       | 0.105                             | 2.59       | 2.103                  | 2.82     | 1.831                  | 80.4%             | 15.4%                 |
| <b>DICTF</b>       | 0.125                             | 2.25       | 2.661                  | 2.48     | 2.293                  | 68.2%             | 23.4%                 |
| <b>FBR</b>         | 0.130                             | 2.18       | 2.745                  | 1.96     | 2.314                  | 69.5%             | 24.6%                 |

**Table S2.** Experimental vertical excitation energies (eV) obtained from the peak wavelengths of absorption spectra in the solution ( $E_{\text{sol}}$ ) and film ( $E_{\text{film}}$ ) phases.

|                    | $E_{\text{sol}}$ | $E_{\text{film}}$ | Reference |
|--------------------|------------------|-------------------|-----------|
| <b>FDICTF</b>      | 1.865            | 1.800             | 1         |
| <b>IT4F</b>        | -                | 1.729             | 2         |
| <b>IC-C6IDT-IC</b> | 1.867            | 1.732             | 3         |
| <b>ITIC</b>        | 1.867            | 1.771             | 4         |
| <b>DC-IDT2T</b>    | 1.771            | -                 | 5         |
| <b>IDTBR</b>       | 1.950            | 1.884             | 6         |
| <b>DICTF</b>       | 2.112            | 1.987             | 1         |
| <b>FBR</b>         | 2.541            | 2.436             | 7         |

1. N. Qiu, H. Zhang, X. Wan, C. Li, X. Ke, H. Feng, B. Kan, H. Zhang, Q. Zhang, Y. Lu and Y. Chen, *Adv. Mater.*, 2017, **29**, 1604964.
2. W. Zhao, S. Li, H. Yao, S. Zhang, Y. Zhang, B. Yang and J. Hou, *J. Am. Chem. Soc.*, 2017, **139**, 7148-7151.
3. Y. Lin, Q. He, F. Zhao, L. Huo, J. Mai, X. Lu, C.-J. Su, T. Li, J. Wang, J. Zhu, Y. Sun, C. Wang and X. Zhan, *J. Am. Chem. Soc.*, 2016, **138**, 2973-2976.
4. Y. Lin, J. Wang, Z.-G. Zhang, H. Bai, Y. Li, D. Zhu and X. Zhan, *Adv. Mater.*, 2015, **27**, 1170-1174.
5. H. Bai, Y. Wang, P. Cheng, J. Wang, Y. Wu, J. Hou and X. Zhan, *J. Mater. Chem. A*, 2015, **3**, 1910-1914.
6. Y. Wu, H. Bai, Z. Wang, P. Cheng, S. Zhu, Y. Wang, W. Ma and X. Zhan, *Energy Environ. Sci.*, 2015, **8**, 3215-3221.
7. D. Baran, T. Kirchartz, S. Wheeler, S. Dimitrov, M. Abdelsamie, J. Gorman, R. S. Ashraf, S. Holliday, A. Wadsworth, N. Gasparini, P. Kaienburg, H. Yan, A. Amassian, C. J. Brabec, J. R. Durrant and I. McCulloch, *Energy Environ. Sci.*, 2016, **9**, 3783-3793.

**Table S3.** Reorganization energies of the electronic processes related to the acceptors in organic solar cells (all in unit of eV).

|                    | $S_0 \rightarrow S_1$ | $S_1 \rightarrow S_0$ | EET <sup>a</sup> | $S_1 \rightarrow A^-$ | $S_0 \rightarrow A^-$ | $A^- \rightarrow S_0$ | ET <sup>b</sup> |
|--------------------|-----------------------|-----------------------|------------------|-----------------------|-----------------------|-----------------------|-----------------|
| <b>FDICTF</b>      | 0.097                 | 0.093                 | 0.191            | 0.057                 | 0.116                 | 0.134                 | 0.250           |
| <b>IT4F</b>        | 0.100                 | 0.099                 | 0.199            | 0.068                 | 0.124                 | 0.142                 | 0.266           |
| <b>IC-C6IDT-IC</b> | 0.104                 | 0.104                 | 0.208            | 0.067                 | 0.160                 | 0.177                 | 0.337           |
| <b>ITIC</b>        | 0.108                 | 0.106                 | 0.214            | 0.064                 | 0.126                 | 0.146                 | 0.272           |
| <b>DC-IDT2T</b>    | 0.110                 | 0.116                 | 0.226            | 0.058                 | 0.118                 | 0.139                 | 0.257           |
| <b>IDTBR</b>       | 0.120                 | 0.151                 | 0.272            | 0.051                 | 0.171                 | 0.161                 | 0.333           |
| <b>DICTF</b>       | 0.175                 | 0.194                 | 0.369            | 0.060                 | 0.148                 | 0.169                 | 0.318           |
| <b>FBR</b>         | 0.221                 | 0.209                 | 0.430            | 0.073                 | 0.189                 | 0.208                 | 0.397           |

<sup>a</sup> Exciton energy transfer.

<sup>b</sup> Electron transfer.
